# Supplementary material for: Preparation and Characterisation of Cellulose Nanocrystal/Alginate/Polyethylene Glycol Diacrylate (CNC/Alg/PEGDA) Hydrogel Using Double Network Crosslinking Technique for Bioprinting Application
Source: MDPI journal article supplement (doi:10.3390/app12020771), 2022-01-13
Supplement: s1 [file s1]

## Supplementary Materials

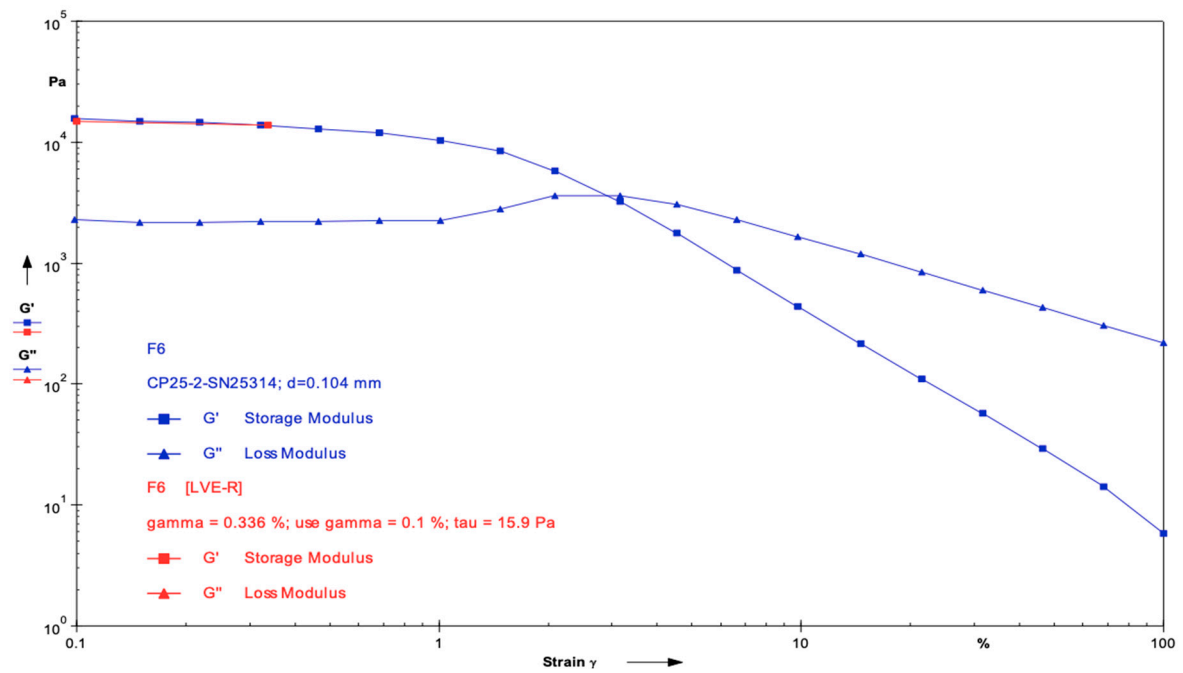

**Figure S1.** Oscillation amplitude sweep (0.1-100%) of F6: [4%CNC:4%Alg:10%PEGDA] hydrogel with a fixed frequency of 1 Hz.

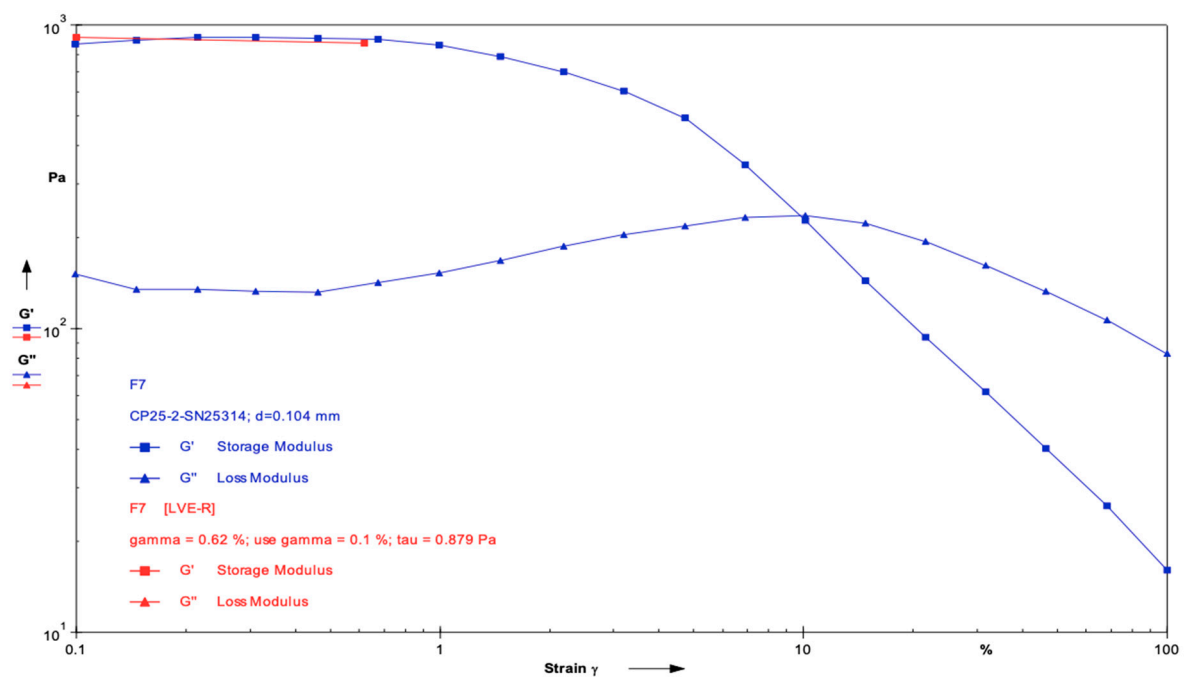

**Figure S2.** Oscillation amplitude sweep (0.1-100%) of F7: [4%Alg:40%PEGDA] hydrogel with a fixed frequency of 1 Hz.

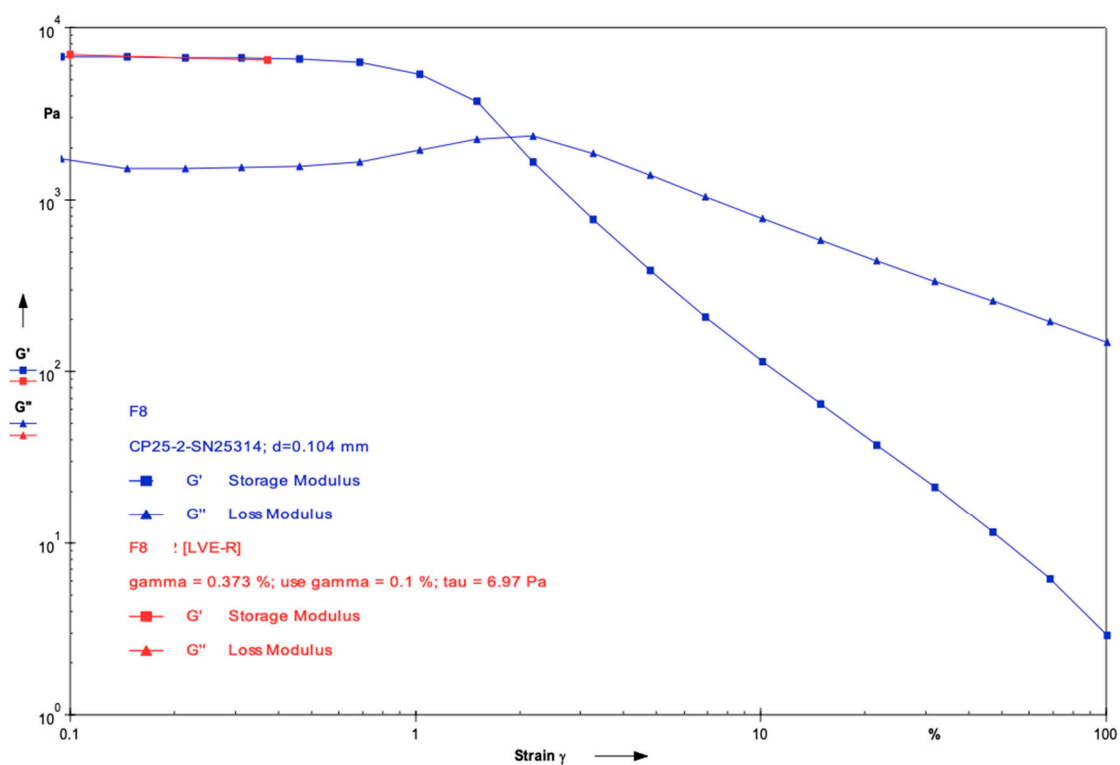

**Figure S3.** Oscillation amplitude sweep (0.1-100 %) of F8: [4%CNC:4%Alg:40%PEGDA] hydrogel with a fixed frequency of 1 Hz.

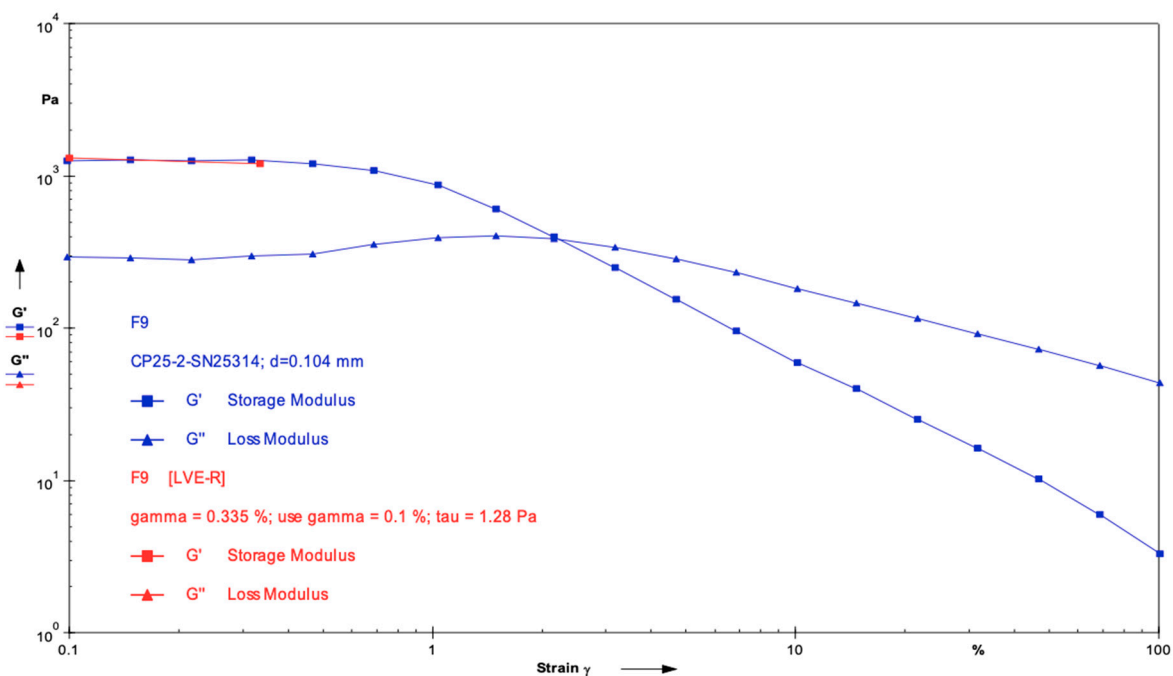

**Figure S4.** Oscillation amplitude sweep (0.1-100 %) of F9: [2%CNC:2.5%Alg:25%PEGDA] hydrogel with a fixed frequency of 1 Hz.
